# Supplementary material
Source: PubMed Central journal article supplement (PMC6139041)
Supplement: NIHMS1500440-supplement-1.pdf [file NIHMS1500440-supplement-1.pdf]

## **Supplementary Materials and Methods**

### **Animal studies**

Body composition (fat and lean) of non-anesthetized mice was measured using the Bruker Minispec NMR analyzer (Bruker). For exercise testing, 22 wk old male mice were acclimated to a treadmill for 5 d by daily running at 10 m/min for 10 min. After 2 d of rest, maximum treadmill exercise capacity was determined as previously described (1). Blood lactate levels before and after sub-maximal exercise were measured using the Lactate Plus meter (Nova Biomedical).

### **Antibodies**

Antibodies were obtained from the following sources: Lamin B1 rabbit pAb (#AB16048), Caspase3 mouse mAb (#9664) (Cell Signaling Technology); Cu/Zn-SOD rabbit pAb (#SOD-100) (Stressgen); CYP2E1 mouse mAb (#AB28146) (Abcam); p53 mouse mAb (DO1, #sc-126) (Santa Cruz Biotechnology).

### **p53 genomic PCR for loss of heterozygosity in liver tumors**

Genomic DNA was isolated from tumor and adjacent normal liver tissue (~50 mg) using the DNeasy Blood & Tissue kit (#69506, Qiagen). The purified genomic DNA (~100 ng) was PCR amplified using the *p53* R334H genotyping primers.

### **Mouse embryonic fibroblast senescence assay**

MEFs were prepared from *p53<sup>334R/R</sup>*, *p53<sup>334H/H</sup>* and *p53<sup>-/-</sup>* mice. Senescence in non-transduced MEFs was quantified after 9 passages by staining for senescence-associated  $\beta$ -galactosidase activity (#9860, Cell Signaling Technology). To examine oncogene-induced senescence, MEFs were transduced with control or oncogenic *Hras<sup>G12V</sup>* retrovirus for 1 d, selected with puromycin for 3 d, and then grown in normal medium for 6 d prior to staining for  $\beta$ -galactosidase (2).  $\beta$ -galactosidase stained MEFs were divided by total cell number to obtain the fraction of senescent cells in 3 non-overlapping fields by microscopy per sample.

### **Nuclear and cytosolic fractionation**

Nuclear and cytoplasmic fractions were prepared from fresh liver tissues of control and DEN treated (100 mg/kg i.p., 24 h) mice using the NE-PER nuclear extraction kit (#78833, Thermo Fisher Scientific) per manufacturer's protocol.

### **Non-denaturing polyacrylamide gel electrophoresis and immunoblotting**

Frozen liver tissue samples (~50 mg) were homogenized in 1 ml cold lysis buffer (20 mM Tris-HCl (pH 7.4), 137 mM NaCl, 1% NP-40, 2 mM EDTA, 10% glycerol, protease/phosphatase inhibitor cocktail (#04-693-116-001 and #04-906-837-001, Roche)) with a IKA Ultra-Turrax homogenizer (Millipore Sigma) for 15 s and centrifuged at 12,000x g at 4 °C for 10 min. The supernatant was depleted of mouse IgG with protein G-agarose (#sc-2002, Santa Cruz Biotechnology) and mixed with NativePAGE sample buffer (#BN2003, Invitrogen) and G-250 sample additive (0.5% final concentration) (#BN2004, Invitrogen) to a final protein concentration of 1 mg/ml. Samples (10  $\mu$ g protein) were loaded into 4-16% NativePAGE Bis-Tris gel (#BN1002, Invitrogen) and resolved for ~3 h at 4 °C according to manufacturer's

protocol. Proteins were transferred to PVDF membrane at 4 °C for ~3 h using NuPAGE transfer buffer (#NP0006, Invitrogen). The membrane was destained using 100% methanol before immunoblotting with mouse monoclonal p53 antibody (#sc-126, Santa Cruz).

## References

1. Park JY, Wang PY, Matsumoto T, Sung HJ, Ma W, Choi JW, *et al.* p53 improves aerobic exercise capacity and augments skeletal muscle mitochondrial DNA content. *Circ Res* **2009**;105:705-12, 11 p following 12
2. Serrano M, Lin AW, McCurrach ME, Beach D, Lowe SW. Oncogenic ras provokes premature cell senescence associated with accumulation of p53 and p16INK4a. *Cell* **1997**;88:593-602

**Supplementary Table 1. Primer sequences used in this study**

|                             | <b>Forward (5' → 3')</b> | <b>Reverse (5' → 3')</b> |
|-----------------------------|--------------------------|--------------------------|
| <b>RT-PCR</b>               |                          |                          |
| <i>BAX</i>                  | CCGGCGAATTGGAGATGAACT    | CCAGCCCATGATGGTTCTGAT    |
| <i>CYP2E1</i>               | CTTAGGGAAAACCTCCGCAC     | GGGACATTCCTGTGTTCCAG     |
| <i>MDM2</i>                 | GCCATTGAACCTTGTGTGATTT   | CATACTGGGCAGGGCTTATT     |
| <i>p21</i>                  | CTGTGGGTCTCTGCCAGCTGC    | GAGGCCTGTCTCACCACCAAG    |
| <i>PUMA</i>                 | AGCAGCACTTAGAGTCGCC      | CCTGGGTAAGGGGAGGAG       |
| <i>TIF</i>                  | CTGAGGATGTGCTGTCTGGGAA   | CCTTTGCCTCCACTTCGGTC     |
| <b>Genotyping</b>           |                          |                          |
| <i>p53</i> R334H            | CCTGTTAAGCGTCTGTTCCC     | CATTCAGCTCCCGGAACATCTC   |
| <b>ChIP-PCR</b>             |                          |                          |
| <i>p53</i> RE of <i>p21</i> | GCAAGGCTGCATCAGTCCTCC    | GGTCTCTGTCTCCATTCATGCTC  |

**Supplementary Table 2. Genotype and gender of pups derived from heterozygous  $p53^{334R/H}$  parents**

|                                  | <b>Male</b> | <b>Female</b> |
|----------------------------------|-------------|---------------|
| <b><math>p53^{334R/R}</math></b> | 57 (22%)    | 63 (26%)      |
| <b><math>p53^{334R/H}</math></b> | 130 (51%)   | 131 (55%)     |
| <b><math>p53^{334H/H}</math></b> | 70 (27%)    | 46 (19%)      |
| <b>P-value</b>                   | 0.50        | 0.11          |

A total of 497 pups derived from heterozygous  $p53^{334R/H}$  crossings were genotyped. Statistical significance was tested by Chi-square test.

**Supplementary Table 3. Incidence of adrenal abnormalities**

|                                              | <i>p53</i> <sup>334R/R</sup> | <i>p53</i> <sup>334R/H</sup> | <i>p53</i> <sup>334H/H</sup> |
|----------------------------------------------|------------------------------|------------------------------|------------------------------|
| <b>Total number of mice</b>                  | 24                           | 39                           | 24                           |
| <b>Number with adrenal abnormalities (%)</b> | 16 (67%)                     | 22 (56%)                     | 14 (58%)                     |
| <b><i>P</i>-value</b>                        |                              | 0.44                         | 0.77                         |

The incidence of adrenal abnormalities at the endpoint of the mouse survival study was defined by the presence of adrenal cortical hyperplasia and/or hypertrophy at necropsy. *P*-values are shown for the respective genotype compared with wild-type *p53*<sup>334R/R</sup> mice. Statistical significance was determined by Fisher's exact test.

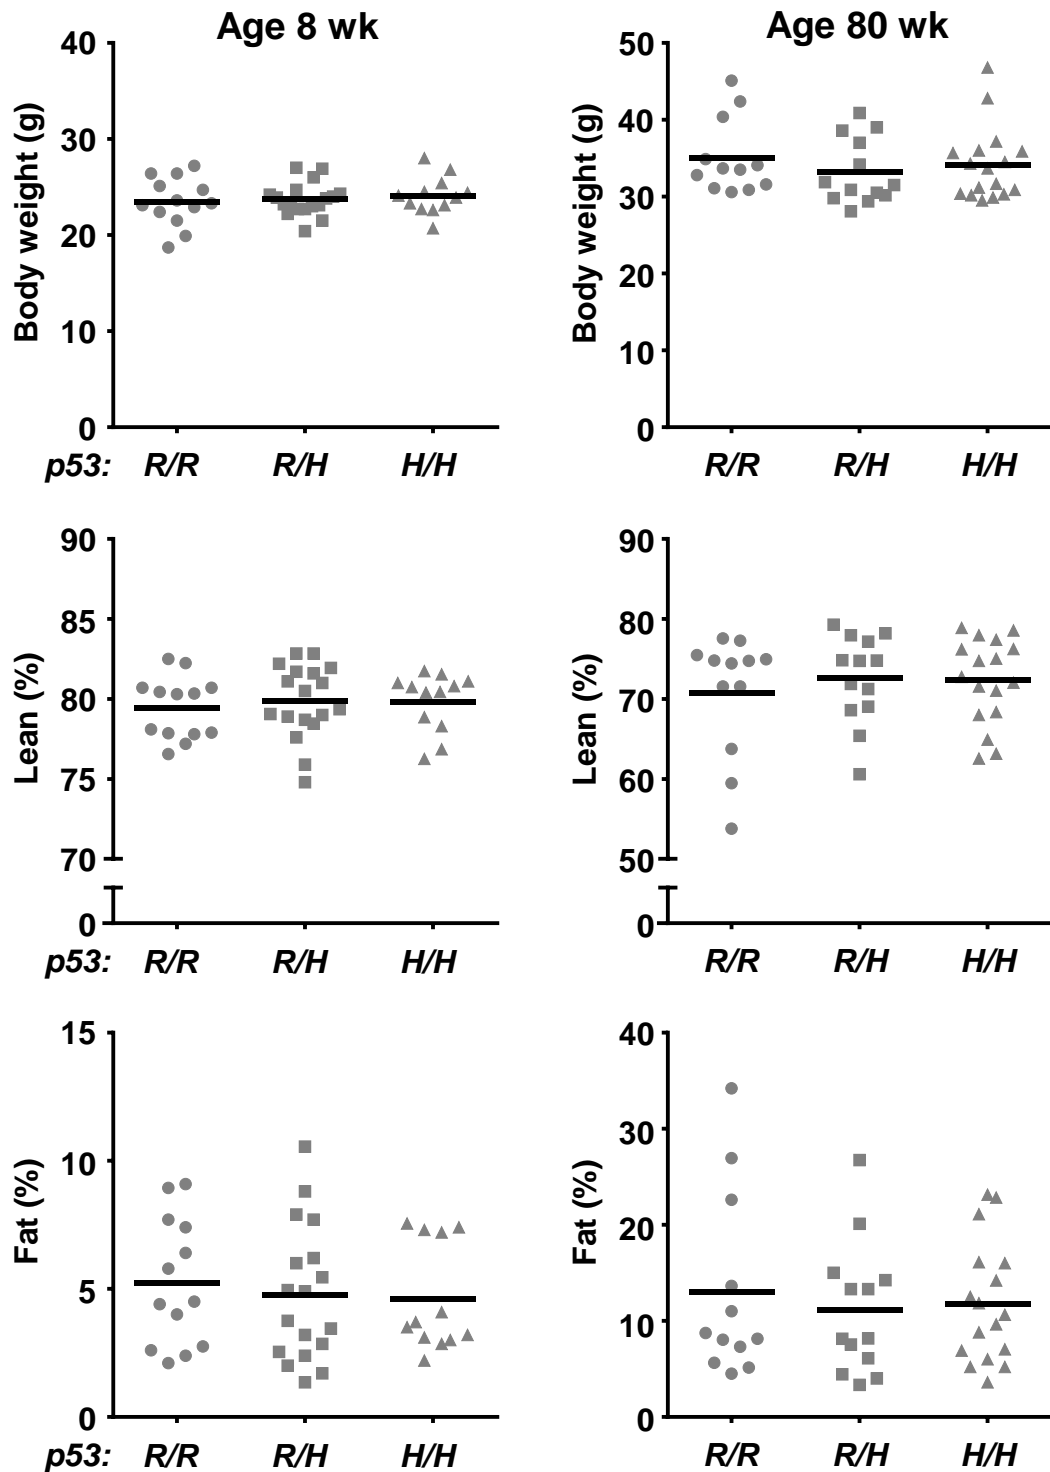

**Supplementary Figure S1. Body weight and composition of male mice at age 8 and 80 wk.** Body mass composition is shown as percent of total body weight. *p53* R334 genotype: wild-type (*R/R*); heterozygous mutant (*R/H*); and homozygous mutant (*H/H*) ( $n = 12-18$ ). Horizontal bars indicate mean.



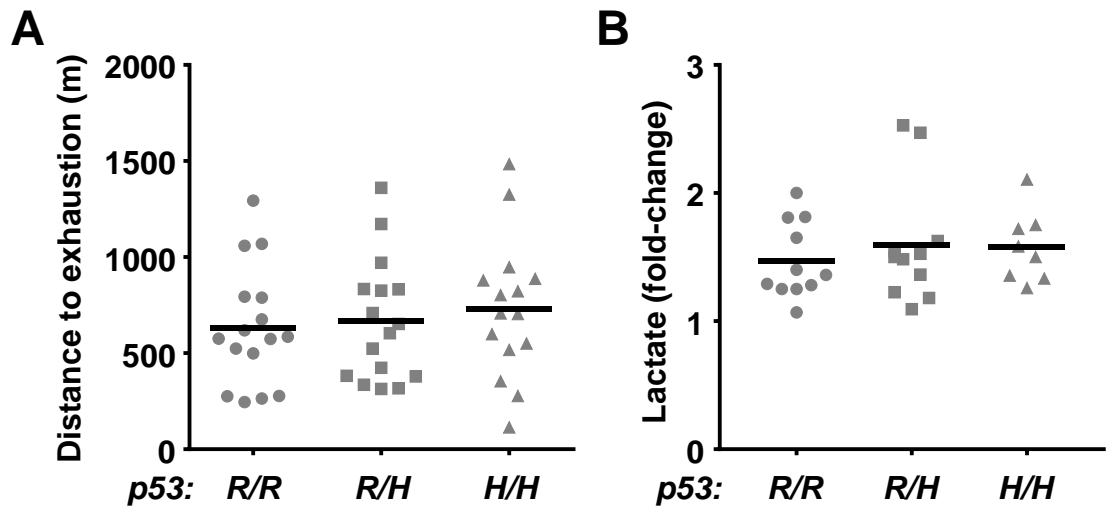

**Supplementary Figure S2. Endurance exercise and aerobic metabolic capacity of male mice.** **A**, maximum running distance was determined using a motorized treadmill ( $n = 15-16$ ). **B**, fold-change in blood lactate level after submaximal exercise compared with basal lactate level are shown as an index of aerobic metabolic capacity ( $n = 8-11$ ). *p53* R334 genotype: wild-type (*R/R*); heterozygous mutant (*R/H*); and homozygous mutant (*H/H*). Horizontal bars indicate mean.

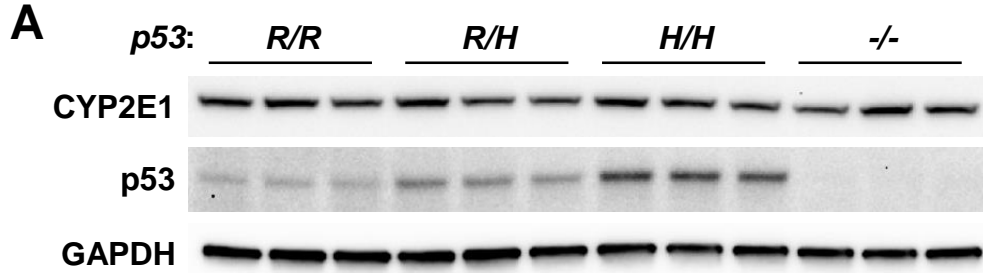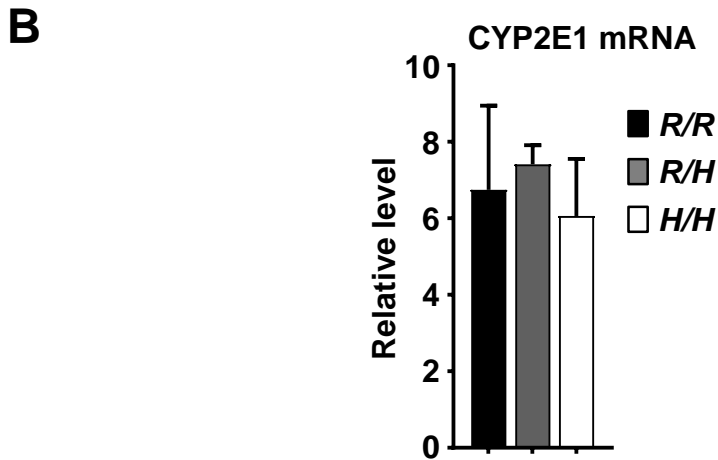

**Supplementary Figure S3. Expression of CYP2E1 in mouse liver by p53 genotype.** **A**, livers were collected from 6 wk old male mice and immunoblotted with the indicated antibodies. **B**, CYP2E1 mRNA was quantified by RT-PCR ( $n = 3$ ). *p53* R334 genotype: wild-type (*R/R*); heterozygous mutant (*R/H*); and homozygous mutant (*H/H*). Values are mean  $\pm$  SD.

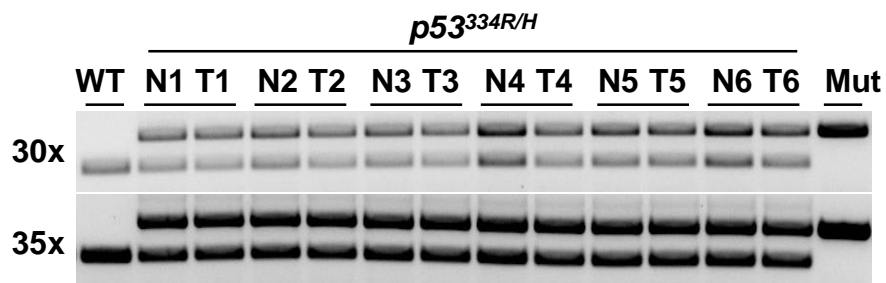

**Supplementary Figure S4. Genomic PCR analysis for *p53* loss of heterozygosity in liver tumors of *p53*<sup>334R/H</sup> mice.** DEN-induced tumor (T) and adjacent normal (N) liver tissues were collected from heterozygous *p53*<sup>334R/H</sup> mice. Genomic DNA was amplified by the indicated number of PCR cycles. *p53* PCR bands from *p53*<sup>334R/R</sup> (WT, 305 bp) and *p53*<sup>334H/H</sup> (Mut, 611 bp) liver samples are shown as markers.

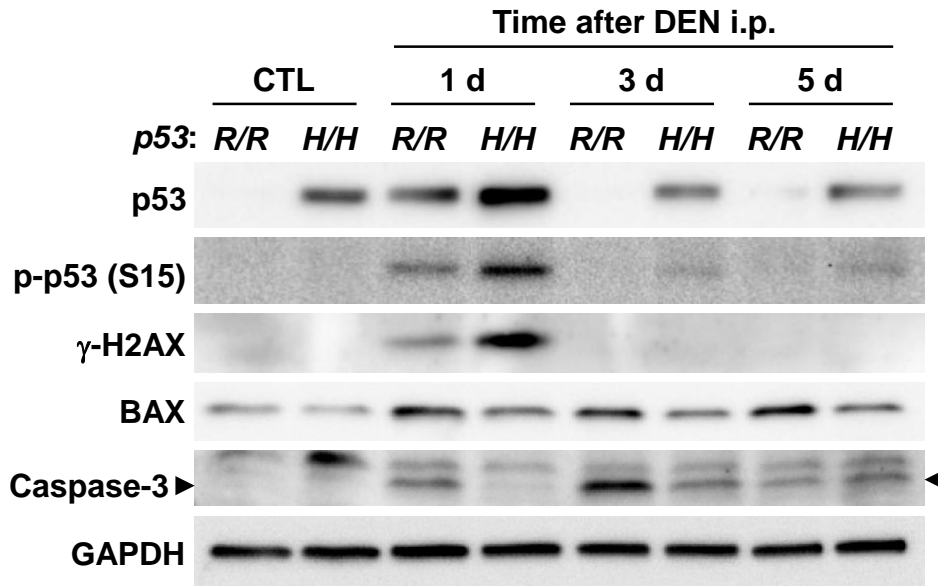

**Supplementary Figure S5. Time course of DNA-damage response and apoptotic protein expression in liver after DEN treatment.** Control (CTL) and DEN treated (100 mg/kg i.p.) mouse livers were harvested and immunoblotted at the indicated time points. *p53* R334 genotype: wild-type (*R/R*) and homozygous mutant (*H/H*).

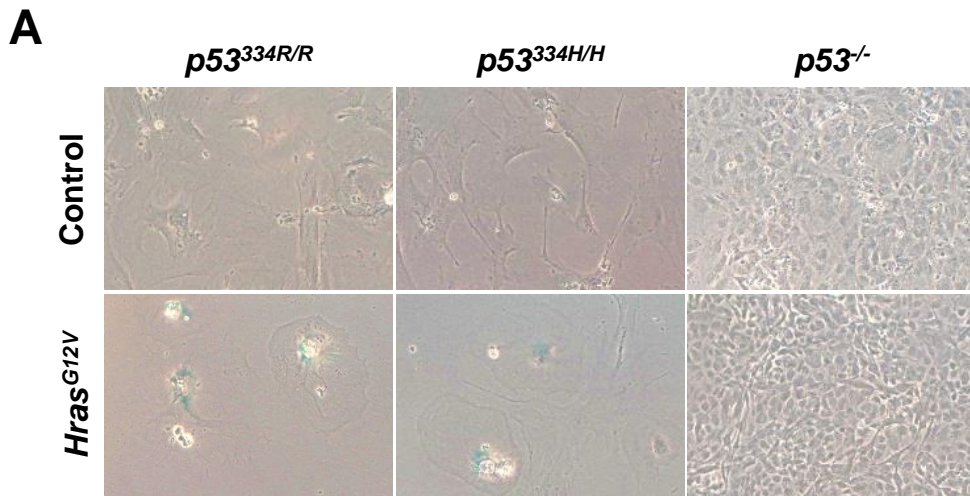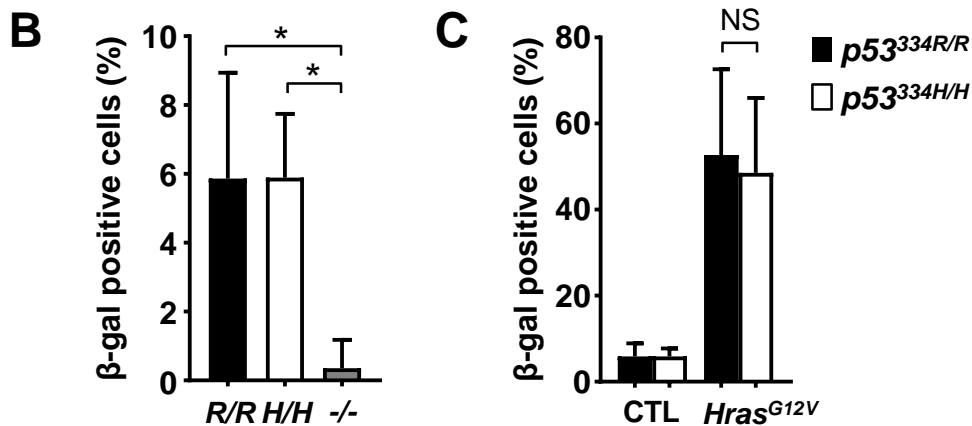

**Supplementary Figure S6. Oncogenic *Hras*<sup>G12V</sup>-induced senescence in mouse embryonic fibroblasts.** **A**, representative images of *p53*<sup>334R/R</sup>, *p53*<sup>334H/H</sup> and *p53*<sup>-/-</sup> MEFs that were transduced with control or oncogenic *Hras*<sup>G12V</sup> retrovirus and stained for senescence-associated β-galactosidase activity (10x objective). **B**, quantification of senescence in non-transduced MEFs of the indicated p53 genotypes ( $n = 3$ ). **C**, quantification of senescence in control or oncogenic *Hras*<sup>G12V</sup> retrovirus-transduced MEFs of the indicated p53 genotypes ( $n = 3$ ). Values are mean  $\pm$  SD. NS, nonsignificant; \* $P < 0.01$ .

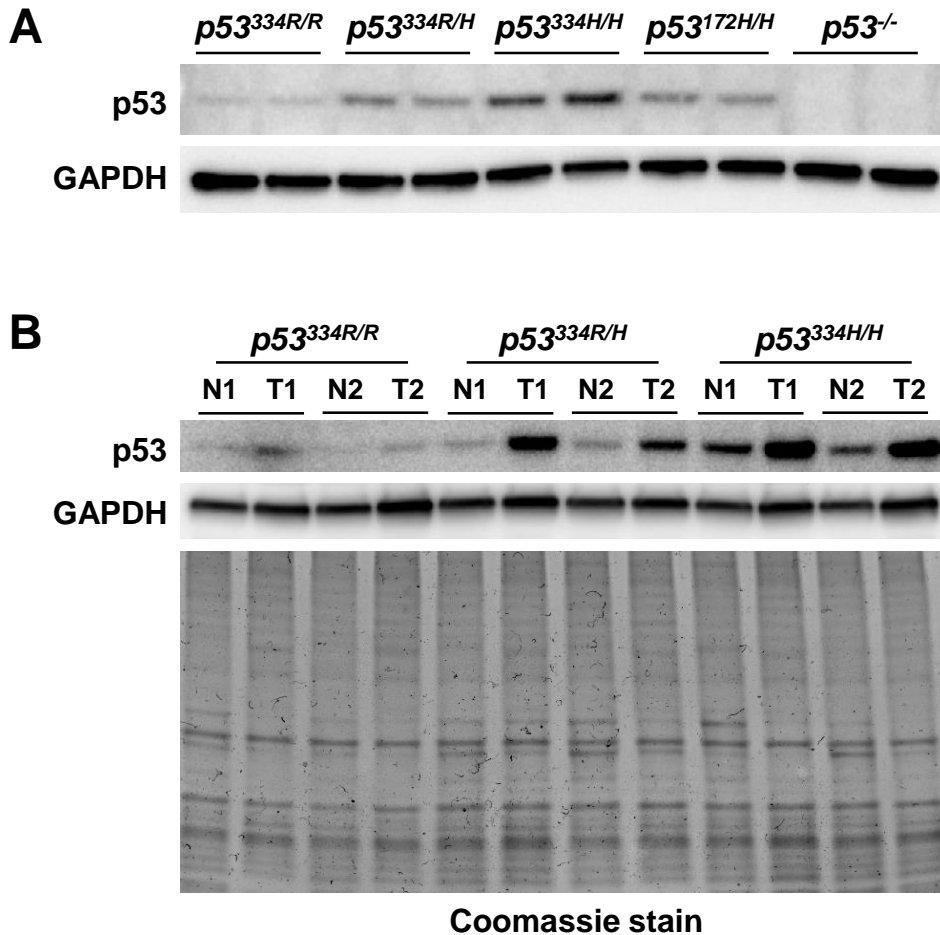

**Supplementary Figure S7. Basal levels of p53 protein in normal liver and DEN-induced liver tumor tissues.** **A**, livers from 6-10 wk old male mice of the indicated p53 genotypes were immunoblotted with p53 and GAPDH antibodies. **B**, tumor (T) and adjacent normal (N) liver tissues were immunoblotted. Coomassie blue stained gel is shown as additional control for protein loading.

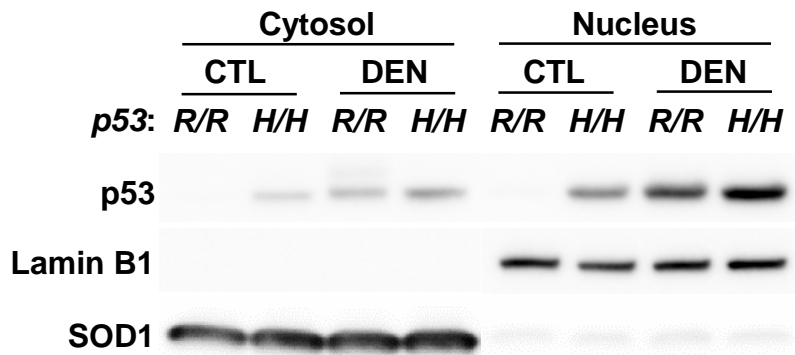

**Supplementary Figure S8. Nuclear localization levels of wildtype and mutant p53 in liver before and after DEN-treatment.** Male mice (6 wk old) were treated with DEN (100 mg/kg i.p.) 24 h prior to liver tissue harvesting, nuclear fractionation, and immunoblotting with the indicated antibodies. Lamin B1 and SOD1 serve as nuclear and cytosolic markers, respectively. *p53* R334 genotype: wild-type (*R/R*) and homozygous mutant (*H/H*).

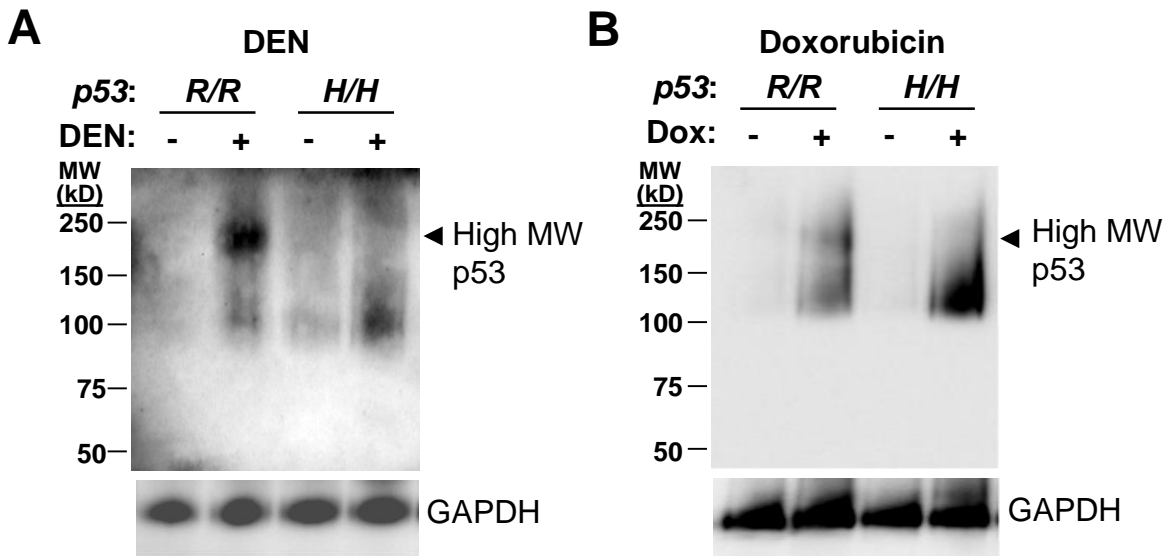

**Supplementary Figure S9. Assessment of p53 oligomerization in liver by non-denaturing polyacrylamide gel electrophoresis.** **A**, control and DEN-treated (24 h after 100 mg/kg i.p.) mouse liver samples. **B**, control and doxorubicin-treated (Dox 6 h, 20 mg/kg i.p.) mouse liver samples. Liver protein samples were resolved by non-denaturing polyacrylamide gel electrophoresis, transferred to PVDF membrane, and immunoblotted to assess for formation of high molecular weight p53 complex. *p53* R334 genotype: wild-type (*R/R*) and homozygous mutant (*H/H*).
